# Supplementary material
Source: PubMed Central journal article supplement (PMC3716867)
Supplement: NIHMS491351-supplement-3.pdf [file NIHMS491351-supplement-3.pdf]

## SUPPLEMENTAL MATERIAL

### SUPPLEMENTAL FIGURES

**Figure I. Macrophage incubation with agLDL in the presence of a physiological concentration of plasminogen results in increased foam cell formation.** huMDMs were incubated for 4 hr with Alexa546-agLDL in the absence or presence of 2  $\mu$ M plasminogen, fixed and labeled with LipidTOX Green. Quantification of the percentage of LipidTOX-positive cells demonstrates a two-fold increase in foam cell formation attributable to plasmin. \*\*  $P \leq 0.01$ , \*\*\*  $P \leq 0.001$  two-way ANOVA. Data compiled from one experiment. Error bars represent the SEM.

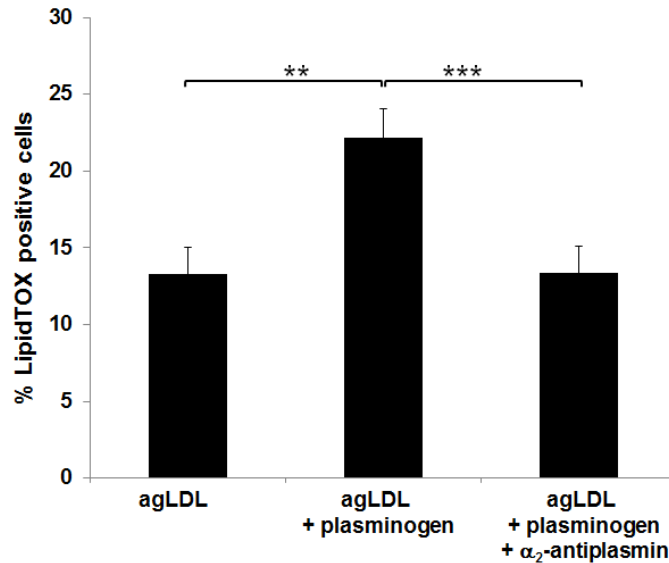

**Movie I. Plasmin mediated cleavage of macrophage associated agLDL.** J774 cells were incubated with Alexa488-agLDL (green) for 60 min prior to data acquisition. Cells were imaged for 7.5 min and then 1 U/ml plasmin was added on the microscope stage. Data acquisition was continued for 112.5 min.
